# Supplementary material for: Influence of Clinical Factors on miR-3613-3p Expression in Colorectal Cancer
Source: MDPI journal article supplement (doi:10.3390/ijms241814023), 2023-09-13
Supplement: s1 [file s1]

| Parameter                   | Surrounding tissue                     |        |        |          |        |        |         | Tumor                                  |       |        |          |       |        |         |
|-----------------------------|----------------------------------------|--------|--------|----------|--------|--------|---------|----------------------------------------|-------|--------|----------|-------|--------|---------|
|                             | N                                      | Mean   | SD     | N        | Mean   | SD     | p-value | N                                      | Mean  | SD     | N        | Mean  | SD     | p-value |
| expression miR-3613-3p (RQ) | cT stage                               |        |        |          |        |        |         | cT stage                               |       |        |          |       |        |         |
|                             | T1+T2                                  |        |        | T3+T4    |        |        | 0.833   | T1+T2                                  |       |        | T3+T4    |       |        | 0.396   |
|                             | 10                                     | 16.668 | 27.213 | 51       | 18.713 | 20.630 |         | 10                                     | 0.294 | 0.2628 | 51       | 0.632 | 1.0235 |         |
|                             | cN stage                               |        |        |          |        |        |         | cN stage                               |       |        |          |       |        |         |
|                             | N0                                     |        |        | N1+N2    |        |        | 0.667   | N0                                     |       |        | N1+N2    |       |        | 0.623   |
|                             | 8                                      | 18.576 | 26.353 | 12       | 23.906 | 13.226 |         | 8                                      | 0.304 | 0.213  | 12       | 0.370 | 0.254  |         |
|                             | pT stage                               |        |        |          |        |        |         | pT stage                               |       |        |          |       |        |         |
|                             | T1+T2                                  |        |        | T3+T4    |        |        | 0.652   | T1+T2                                  |       |        | T3+T4    |       |        | 0.361   |
|                             | 16                                     | 19.927 | 23.211 | 50       | 16.423 | 20.520 |         | 16                                     | 0.314 | 0.259  | 50       | 0.638 | 1.034  |         |
|                             | pN stage                               |        |        |          |        |        |         | pN stage                               |       |        |          |       |        |         |
|                             | N0                                     |        |        | N1 + N2  |        |        | 0.291   | N0                                     |       |        | N1 + N2  |       |        | 0.657   |
|                             | 31                                     | 13.692 | 18.045 | 34       | 20.693 | 23.329 |         | 31                                     | 0.635 | 1.070  | 34       | 0.502 | 0.794  |         |
|                             | cM stage                               |        |        |          |        |        |         | cM stage                               |       |        |          |       |        |         |
|                             | M0                                     |        |        | M1       |        |        | 0.016   | M0                                     |       |        | M1       |       |        | 0.436   |
|                             | 52                                     | 16.020 | 17.871 | 6        | 46.265 | 41.951 |         | 52                                     | 0.632 | 1.008  | 6        | 0.228 | 0.236  |         |
|                             | pM stage                               |        |        |          |        |        |         | pM stage                               |       |        |          |       |        |         |
|                             | M0                                     |        |        | M1       |        |        | 0.195   | M0                                     |       |        | M1       |       |        | 0.278   |
|                             | 56                                     | 15.683 | 17.729 | 9        | 28.761 | 38.149 |         | 56                                     | 0.625 | 0.971  | 9        | 0.183 | 0.195  |         |
|                             | Advancement according to the TNM scale |        |        |          |        |        |         | Advancement according to the TNM scale |       |        |          |       |        |         |
|                             | I + II                                 |        |        | III + IV |        |        | 0.291   | I + II                                 |       |        | III + IV |       |        | 0.681   |
|                             | 30                                     | 13.692 | 18.045 | 35       | 20.693 | 23.329 |         | 30                                     | 0.622 | 1.042  | 35       | 0.502 | 0.794  |         |
